# Supplementary material for: Transcriptional profiling reveals progeroid Ercc1-/Δ mice as a model system for glomerular aging
Source: PubMed Central journal article supplement (PMC3751413; doi:10.1186/1471-2164-14-559), 2013-08-16

# Suppl. Figure 3 B

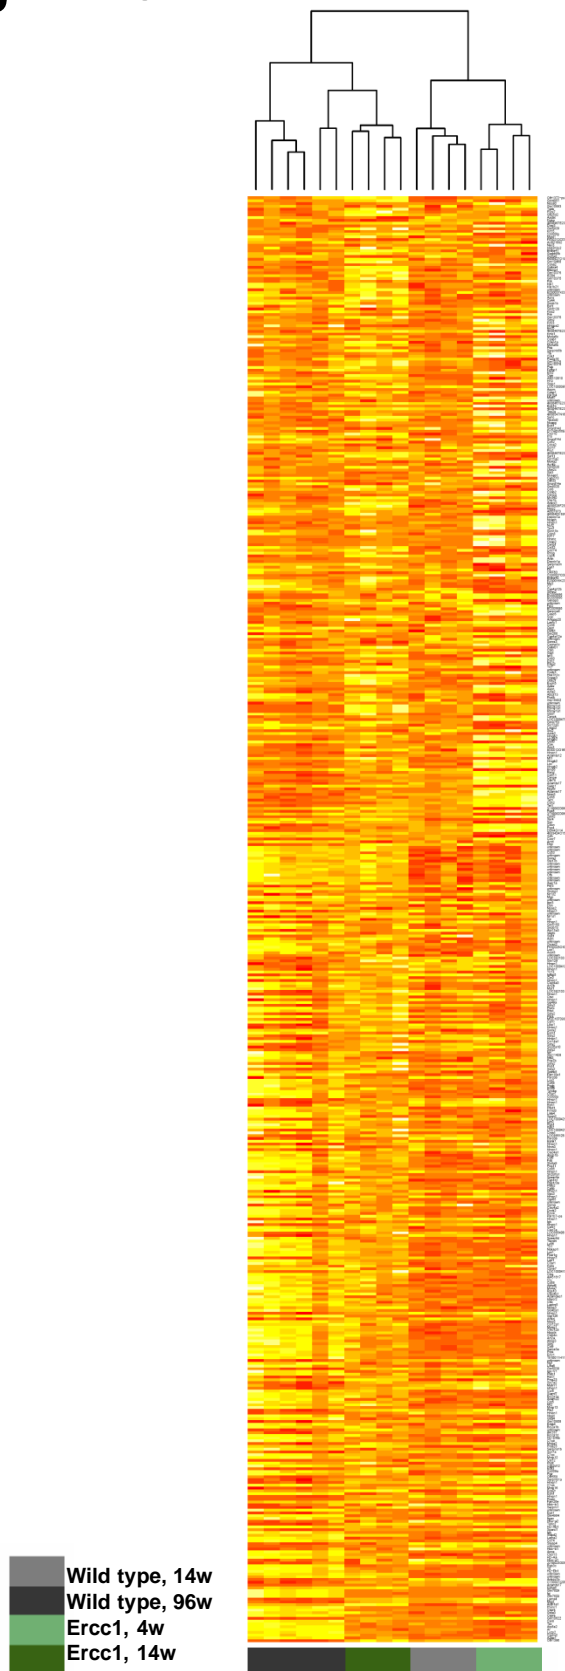

Supplement: 1471-2164-14-559-S4.pdf [file 1471-2164-14-559-S4.pdf]
