# Supplementary material for: Transcriptional profiling reveals progeroid Ercc1-/Δ mice as a model system for glomerular aging
Source: PubMed Central journal article supplement (PMC3751413; doi:10.1186/1471-2164-14-559), 2013-08-16
Supplement: 1471-2164-14-559-S5.pdf [file 1471-2164-14-559-S5.pdf]

# Suppl. table 1: genes differentially expressed in aged WT mice

| GO BP Term                                                                                                                | # of Genes | P-value  | Genes                                                                                                                                                                                  |
|---------------------------------------------------------------------------------------------------------------------------|------------|----------|----------------------------------------------------------------------------------------------------------------------------------------------------------------------------------------|
| immune response                                                                                                           | 26         | 1.70E-11 | LY86, TLR1, CCL9, C1QC, CD74, CCL6, GP49A, CFH, FCER1G, CLEC4A2, SPON2, PTPRC, TLR13, IGJ, H2-AB1, CLEC4N, C1QA, C1QB, CCR5, CD300A, LILRB4, H2-EB1, CCR2, H2-AA, CLEC7A, H2-DMA, LCP1 |
| leukocyte activation                                                                                                      | 16         | 8.95E-09 | FYB, PTPRC, TLR1, ITGB2, CD74, CD48, DOCK2, CD86, BCL2A1D, ITGAX, SLC7A2, FCER1G, BANK1, H2-DMA, LCP1, LCP2                                                                            |
| defense response                                                                                                          | 21         | 4.13E-08 | PTPRC, LYZ2, LYZ1, C5AR1, LY86, TLR13, TLR1, ITGB2, C1QC, TRF, CD74, C1QA, C1QB, SERPINA1B, CCR5, SLC7A2, CCR2, CFH, FCER1G, H2-AA, CLEC7A                                             |
| cell activation                                                                                                           | 16         | 4.26E-08 | FYB, PTPRC, TLR1, ITGB2, CD74, CD48, DOCK2, CD86, BCL2A1D, ITGAX, SLC7A2, FCER1G, BANK1, H2-DMA, LCP1, LCP2                                                                            |
| antigen processing and presentation of peptide antigen via MHC class II                                                   | 6          | 4.62E-07 | H2-EB1, H2-AA, FCER1G, H2-AB1, H2-DMA, CD74                                                                                                                                            |
| antigen processing and presentation of exogenous peptide antigen via MHC class II                                         | 6          | 4.62E-07 | H2-EB1, H2-AA, FCER1G, H2-AB1, H2-DMA, CD74                                                                                                                                            |
| inflammatory response                                                                                                     | 14         | 6.58E-07 | LY86, TLR13, TLR1, ITGB2, C1QC, TRF, C1QA, C1QB, SERPINA1B, CCR5, SLC7A2, CCR2, CFH, CLEC7A                                                                                            |
| antigen processing and presentation of peptide or polysaccharide antigen via MHC class II                                 | 6          | 1.20E-06 | H2-EB1, H2-AA, FCER1G, H2-AB1, H2-DMA, CD74                                                                                                                                            |
| antigen processing and presentation of exogenous peptide antigen                                                          | 6          | 3.36E-06 | H2-EB1, H2-AA, FCER1G, H2-AB1, H2-DMA, CD74                                                                                                                                            |
| T cell activation                                                                                                         | 10         | 3.41E-06 | CD48, PTPRC, CD86, DOCK2, BCL2A1D, ITGAX, ITGB2, H2-DMA, CD74, LCP1                                                                                                                    |
| positive regulation of response to stimulus                                                                               | 12         | 3.95E-06 | C1QA, C1QB, PTPRC, BCL2A1D, EYA1, CFH, H2-AA, FCER1G, EDA2R, CLEC7A, H2-DMA, C1QC                                                                                                      |
| antigen processing and presentation of exogenous antigen                                                                  | 6          | 9.41E-06 | H2-EB1, H2-AA, FCER1G, H2-AB1, H2-DMA, CD74                                                                                                                                            |
| positive regulation of immune response                                                                                    | 10         | 1.25E-05 | C1QA, C1QB, PTPRC, BCL2A1D, CFH, H2-AA, FCER1G, CLEC7A, H2-DMA, C1QC                                                                                                                   |
| response to wounding                                                                                                      | 15         | 1.62E-05 | LY86, TLR1, TLR13, ITGB2, C1QC, TRF, C1QA, C1QB, SERPINA1B, CCR5, SLC7A2, CCR2, CFH, CLEC7A, LCP1                                                                                      |
| antigen processing and presentation of peptide antigen                                                                    | 6          | 2.93E-05 | H2-EB1, H2-AA, FCER1G, H2-AB1, H2-DMA, CD74                                                                                                                                            |
| activation of immune response                                                                                             | 8          | 3.17E-05 | C1QA, C1QB, PTPRC, BCL2A1D, CFH, FCER1G, CLEC7A, C1QC                                                                                                                                  |
| lymphocyte activation                                                                                                     | 11         | 3.17E-05 | CD48, PTPRC, CD86, DOCK2, BCL2A1D, ITGAX, ITGB2, BANK1, H2-DMA, CD74, LCP1                                                                                                             |
| immunoglobulin mediated immune response                                                                                   | 7          | 4.88E-05 | C1QA, C1QB, H2-AA, FCER1G, H2-DMA, C1QC, CD74                                                                                                                                          |
| immune effector process                                                                                                   | 9          | 5.20E-05 | C1QA, C1QB, PTPRC, CFH, H2-AA, FCER1G, H2-DMA, C1QC, CD74                                                                                                                              |
| B cell mediated immunity                                                                                                  | 7          | 5.83E-05 | C1QA, C1QB, H2-AA, FCER1G, H2-DMA, C1QC, CD74                                                                                                                                          |
| positive thymic T cell selection                                                                                          | 4          | 6.02E-05 | PTPRC, DOCK2, H2-DMA, CD74                                                                                                                                                             |
| positive regulation of immune system process                                                                              | 11         | 6.03E-05 | C1QA, C1QB, PTPRC, BCL2A1D, CFH, H2-AA, FCER1G, CLEC7A, H2-DMA, C1QC, CD74                                                                                                             |
| positive T cell selection                                                                                                 | 4          | 1.27E-04 | PTPRC, DOCK2, H2-DMA, CD74                                                                                                                                                             |
| lymphocyte mediated immunity                                                                                              | 7          | 1.40E-04 | C1QA, C1QB, H2-AA, FCER1G, H2-DMA, C1QC, CD74                                                                                                                                          |
| taxis                                                                                                                     | 8          | 1.44E-04 | C3AR1, DOCK2, C5AR1, CCL9, FCER1G, ITGB2, SEMA3A, CCL6                                                                                                                                 |
| chemotaxis                                                                                                                | 8          | 1.44E-04 | C3AR1, DOCK2, C5AR1, CCL9, FCER1G, ITGB2, SEMA3A, CCL6                                                                                                                                 |
| T cell proliferation                                                                                                      | 5          | 1.93E-04 | PTPRC, CD86, DOCK2, ITGAX, ITGB2                                                                                                                                                       |
| acute inflammatory response                                                                                               | 7          | 2.00E-04 | C1QA, C1QB, SERPINA1B, SLC7A2, CFH, C1QC, TRF                                                                                                                                          |
| humoral immune response                                                                                                   | 6          | 2.43E-04 | C1QA, C1QB, CCR2, IGJ, CFH, C1QC                                                                                                                                                       |
| adaptive immune response                                                                                                  | 7          | 2.44E-04 | C1QA, C1QB, H2-AA, FCER1G, H2-DMA, C1QC, CD74                                                                                                                                          |
| adaptive immune response based on somatic recombination of immune receptors built from immunoglobulin superfamily domains | 7          | 2.44E-04 | C1QA, C1QB, H2-AA, FCER1G, H2-DMA, C1QC, CD74                                                                                                                                          |
| leukocyte mediated immunity                                                                                               | 7          | 3.34E-04 | C1QA, C1QB, H2-AA, FCER1G, H2-DMA, C1QC, CD74                                                                                                                                          |
| positive regulation of developmental process                                                                              | 10         | 4.12E-04 | PTPRC, VEGFC, MSR1, SOCS2, CLU, H2-AA, ITGB2, H2-DMA, CD74, NGF                                                                                                                        |
| thymic T cell selection                                                                                                   | 4          | 4.64E-04 | PTPRC, DOCK2, H2-DMA, CD74                                                                                                                                                             |
| myeloid leukocyte activation                                                                                              | 5          | 4.65E-04 | FYB, SLC7A2, TLR1, FCER1G, LCP2                                                                                                                                                        |
| positive regulation of cell differentiation                                                                               | 9          | 5.00E-04 | PTPRC, VEGFC, MSR1, SOCS2, CLU, H2-AA, H2-DMA, CD74, NGF                                                                                                                               |
| innate immune response                                                                                                    | 7          | 8.92E-04 | C1QA, C1QB, TLR13, TLR1, CFH, CLEC7A, C1QC                                                                                                                                             |
| locomotory behavior                                                                                                       | 10         | 9.11E-04 | C3AR1, DOCK2, C5AR1, NPAS3, CCL9, FCER1G, ITGB2, SEMA3A, CALB1, CCL6                                                                                                                   |
| lymphocyte proliferation                                                                                                  | 5          | 9.40E-04 | PTPRC, CD86, DOCK2, ITGAX, ITGB2                                                                                                                                                       |
