# Supplementary material for: Transcriptional profiling reveals progeroid Ercc1-/Δ mice as a model system for glomerular aging
Source: PubMed Central journal article supplement (PMC3751413; doi:10.1186/1471-2164-14-559), 2013-08-16
Supplement: 1471-2164-14-559-S6.pdf [file 1471-2164-14-559-S6.pdf]

## Suppl. table 2: genes differentially expressed in aged *Ercc1*<sup>-Δ</sup> mice

| GO BP Term                                   | # of Genes | P-value  | Genes                                                                                                                                                            |
|----------------------------------------------|------------|----------|------------------------------------------------------------------------------------------------------------------------------------------------------------------|
| M phase of mitotic cell cycle                | 19         | 5.30E-11 | CDK1, KIF11, NUF2, KNTC1, CENPF, NUSAP1, BIRC5, ANLN, NDC80, AURKB, UBE2C, CCNB1, NCAPH, CCNB2, CDCA2, BUB1, BUB1B, CCNA2, ASPM                                  |
| nuclear division                             | 18         | 3.30E-10 | CDK1, KIF11, NUF2, KNTC1, NUSAP1, ANLN, NDC80, BIRC5, AURKB, UBE2C, CCNB1, NCAPH, CCNB2, CDCA2, BUB1, BUB1B, CCNA2, ASPM                                         |
| mitosis                                      | 18         | 3.30E-10 | CDK1, KIF11, NUF2, KNTC1, NUSAP1, ANLN, NDC80, BIRC5, AURKB, UBE2C, CCNB1, NCAPH, CCNB2, CDCA2, BUB1, BUB1B, CCNA2, ASPM                                         |
| cell division                                | 21         | 5.12E-10 | CDK1, CKS1B, KIF11, PRC1, NUF2, KNTC1, NUSAP1, BIRC5, ANLN, NDC80, AURKB, UBE2C, CCNB1, NCAPH, CCNB2, CDCA2, BUB1, BUB1B, CCNA2, TOP2A, ASPM                     |
| organelle fission                            | 18         | 5.81E-10 | CDK1, KIF11, NUF2, KNTC1, NUSAP1, ANLN, NDC80, BIRC5, AURKB, UBE2C, CCNB1, NCAPH, CCNB2, CDCA2, BUB1, BUB1B, CCNA2, ASPM                                         |
| M phase                                      | 21         | 5.81E-10 | CDK1, KIF11, MKI67, NUF2, KNTC1, TPX2, NUSAP1, CENPF, BIRC5, ANLN, NDC80, AURKB, UBE2C, CCNB1, NCAPH, CCNB2, CDCA2, BUB1, BUB1B, CCNA2, ASPM                     |
| mitotic cell cycle                           | 19         | 2.24E-09 | CDK1, KIF11, NUF2, KNTC1, CENPF, NUSAP1, BIRC5, ANLN, NDC80, AURKB, UBE2C, CCNB1, NCAPH, CCNB2, CDCA2, BUB1, BUB1B, CCNA2, ASPM                                  |
| cell cycle phase                             | 21         | 7.45E-09 | CDK1, KIF11, MKI67, NUF2, KNTC1, TPX2, NUSAP1, CENPF, BIRC5, ANLN, NDC80, AURKB, UBE2C, CCNB1, NCAPH, CCNB2, CDCA2, BUB1, BUB1B, CCNA2, ASPM                     |
| cell cycle process                           | 21         | 1.50E-07 | CDK1, KIF11, MKI67, NUF2, KNTC1, TPX2, NUSAP1, CENPF, BIRC5, ANLN, NDC80, AURKB, UBE2C, CCNB1, NCAPH, CCNB2, CDCA2, BUB1, BUB1B, CCNA2, ASPM                     |
| inflammatory response                        | 15         | 1.17E-06 | CCL3, LY86, TLR1, F8, C1QC, CXCL10, C1QB, CCL12, SERPINA3N, P2RX7, CCR5, CD44, CCR2, IL1B, CLEC7A                                                                |
| defense response                             | 21         | 1.19E-06 | PTPRC, CCL3, LY22, LY86, TLR1, F8, C1QC, CD74, CXCL10, C1QB, CCL12, SERPINA3N, P2RX7, CCR5, CD44, CCR2, FCER1G, IL1B, H2-AA, CLEC7A, DEFB1                       |
| response to wounding                         | 18         | 2.28E-06 | CCL3, PLEK, LY86, TLR1, F8, GJA1, C1QC, CXCL10, C1QB, CCL12, SERPINA3N, P2RX7, CCR5, CD44, CCR2, IL1B, CLEC7A, SCNN1B                                            |
| cell cycle                                   | 24         | 3.34E-06 | CKAP2, CDK1, CKS1B, KIF11, PRC1, MKI67, NUF2, TPX2, KNTC1, NUSAP1, CENPF, BIRC5, ANLN, NDC80, AURKB, UBE2C, CCNB1, NCAPH, CCNB2, CDCA2, BUB1, BUB1B, CCNA2, ASPM |
| immune response                              | 19         | 3.45E-05 | PTPRC, CCL3, LY86, TLR1, H2-AB1, C1QC, CD74, CXCL10, C1QB, CCL12, CCR5, GP49A, LILRB4, CCR2, CD300LG, FCER1G, IL1B, H2-AA, CLEC7A, DEFB1                         |
| cytokinesis                                  | 5          | 3.62E-04 | PRC1, NUSAP1, BIRC5, ANLN, AURKB                                                                                                                                 |
| positive regulation of developmental process | 11         | 4.35E-04 | PTPRC, ADRB2, P2RX7, CD36, MSR1, CLU, H2-AA, GJA1, IL1B, CD74, IFI204                                                                                            |
| positive regulation of response to stimulus  | 10         | 6.54E-04 | C1QB, PTPRC, P2RX7, EYA1, H2-AA, FCER1G, IL1B, EDA2R, CLEC7A, C1QC                                                                                               |
