# Supplementary material for: Transcriptional profiling reveals progeroid Ercc1-/Δ mice as a model system for glomerular aging
Source: PubMed Central journal article supplement (PMC3751413; doi:10.1186/1471-2164-14-559), 2013-08-16
Supplement: 1471-2164-14-559-S7.pdf [file 1471-2164-14-559-S7.pdf]

## Suppl. table 3: overlap of genes differentially expressed in aged WT and aged Ercc1<sup>-Δ</sup> mice

| GO BP Term                                                                                                                | # of Genes | P-value  | Genes                                                                                         |
|---------------------------------------------------------------------------------------------------------------------------|------------|----------|-----------------------------------------------------------------------------------------------|
| immune response                                                                                                           | 13         | 1.21E-07 | PTPRC, LY86, TLR1, H2-AB1, C1QC, CD74, C1QB, CCR5, GP49A, CCR2, LILRB4, H2-AA, FCER1G, CLEC7A |
| defense response                                                                                                          | 12         | 6.41E-07 | C1QB, PTPRC, LY22, CCR5, LY86, CCR2, TLR1, H2-AA, FCER1G, CLEC7A, C1QC, CD74                  |
| positive regulation of response to stimulus                                                                               | 8          | 5.60E-06 | C1QB, PTPRC, EYA1, H2-AA, FCER1G, EDA2R, CLEC7A, C1QC                                         |
| antigen processing and presentation of exogenous peptide antigen via MHC class II                                         | 4          | 2.70E-05 | H2-AA, FCER1G, H2-AB1, CD74                                                                   |
| antigen processing and presentation of peptide antigen via MHC class II                                                   | 4          | 2.70E-05 | H2-AA, FCER1G, H2-AB1, CD74                                                                   |
| antigen processing and presentation of peptide or polysaccharide antigen via MHC class II                                 | 4          | 4.63E-05 | H2-AA, FCER1G, H2-AB1, CD74                                                                   |
| antigen processing and presentation of exogenous peptide antigen                                                          | 4          | 8.37E-05 | H2-AA, FCER1G, H2-AB1, CD74                                                                   |
| immunoglobulin mediated immune response                                                                                   | 5          | 8.91E-05 | C1QB, H2-AA, FCER1G, C1QC, CD74                                                               |
| B cell mediated immunity                                                                                                  | 5          | 1.01E-04 | C1QB, H2-AA, FCER1G, C1QC, CD74                                                               |
| immune effector process                                                                                                   | 6          | 1.06E-04 | C1QB, PTPRC, H2-AA, FCER1G, C1QC, CD74                                                        |
| positive regulation of immune system process                                                                              | 7          | 1.15E-04 | C1QB, PTPRC, H2-AA, FCER1G, CLEC7A, C1QC, CD74                                                |
| positive regulation of immune response                                                                                    | 6          | 1.51E-04 | C1QB, PTPRC, H2-AA, FCER1G, CLEC7A, C1QC                                                      |
| antigen processing and presentation of exogenous antigen                                                                  | 4          | 1.53E-04 | H2-AA, FCER1G, H2-AB1, CD74                                                                   |
| lymphocyte mediated immunity                                                                                              | 5          | 1.85E-04 | C1QB, H2-AA, FCER1G, C1QC, CD74                                                               |
| inflammatory response                                                                                                     | 7          | 1.86E-04 | C1QB, CCR5, LY86, CCR2, TLR1, CLEC7A, C1QC                                                    |
| adaptive immune response based on somatic recombination of immune receptors built from immunoglobulin superfamily domains | 5          | 2.72E-04 | C1QB, H2-AA, FCER1G, C1QC, CD74                                                               |
| adaptive immune response                                                                                                  | 5          | 2.72E-04 | C1QB, H2-AA, FCER1G, C1QC, CD74                                                               |
| activation of immune response                                                                                             | 5          | 2.98E-04 | C1QB, PTPRC, FCER1G, CLEC7A, C1QC                                                             |
| antigen processing and presentation of peptide antigen                                                                    | 4          | 3.00E-04 | H2-AA, FCER1G, H2-AB1, CD74                                                                   |
| leukocyte mediated immunity                                                                                               | 5          | 3.40E-04 | C1QB, H2-AA, FCER1G, C1QC, CD74                                                               |
| immune response-regulating cell surface receptor signaling pathway                                                        | 4          | 5.92E-04 | PTPRC, SH2D1B1, FCER1G, CLEC7A                                                                |
| immune response-regulating signal transduction                                                                            | 4          | 9.67E-04 | PTPRC, SH2D1B1, FCER1G, CLEC7A                                                                |
