# Supplementary material for: Transcriptional profiling reveals progeroid Ercc1-/Δ mice as a model system for glomerular aging
Source: PubMed Central journal article supplement (PMC3751413; doi:10.1186/1471-2164-14-559), 2013-08-16
Supplement: 1471-2164-14-559-S8.pdf [file 1471-2164-14-559-S8.pdf]

## Suppl. table 4: List of genes encoding slit diaphragm proteins

| Differential expression of genes encoding slit diaphragm proteins |  |      |               |  |  |  |
|-------------------------------------------------------------------|--|------|---------------|--|--|--|
| Glomeruli                                                         |  |      |               |  |  |  |
| Gene                                                              |  | WT   | Ercc1 -/delta |  |  |  |
| Podocin                                                           |  | -1,1 | -1,0          |  |  |  |
| Synaptopodin2                                                     |  | 1,0  | 1,1           |  |  |  |
| CD2AP                                                             |  | -1,1 | -1,0          |  |  |  |
| ZO-1                                                              |  | -1,3 | -1,0          |  |  |  |
| Fyn                                                               |  | -1,3 | -1,0          |  |  |  |
| Nephrin                                                           |  | -1,2 | 1,0           |  |  |  |
| Neph1                                                             |  | -1,3 | -1,1          |  |  |  |
| Neph2                                                             |  | -1,0 | -1,1          |  |  |  |
|                                                                   |  |      |               |  |  |  |
|                                                                   |  |      |               |  |  |  |
